1 **EEG-based neurofeedback with network components**  
2 **extraction: data-driven approach by multilayer ICA**  
3 **extension and simultaneous EEG-fMRI measurements**

4

5 Takeshi Ogawa<sup>1\*</sup>, Hiroki Moriya<sup>1</sup>, Nobuo Hiroe<sup>2</sup>, Motoaki Kawanabe<sup>1,3</sup>, Jun-ichiro  
6 Hirayama<sup>3,4</sup>

7 <sup>1</sup>Cognitive Mechanisms Laboratories, Advanced Telecommunications Research Institute  
8 International, Seika-cho, Soraku-gun, Kyoto, Japan

9 <sup>2</sup>Neural Information Analysis Laboratories, Advanced Telecommunications Research  
10 Institute International, Seika-cho, Soraku-gun, Kyoto, Japan

11 <sup>3</sup>RIKEN Center for Advanced Intelligence Project, Seika-cho, Soraku-gun, Kyoto, Japan

12 <sup>4</sup>Human Informatics and Interaction Research Institute, National Institute of Advanced  
13 Industrial Science and Technology (AIST), Tsukuba City, Ibaraki, Japan

14

15 \*Correspondence:

16 Takeshi Ogawa, Ph.D

17 t.ogawa@atr.jp

18

## 19 **Abstract**

20 Advanced treatments for depressive symptoms, such as a real-time functional MRI  
21 (fMRI) neurofeedback have been proven by several studies. In particular, regularization  
22 of functional connectivity (FC) between executive control network (ECN) and default  
23 mode network (DMN) during fMRI neurofeedback have been proposed to reduce  
24 depressive symptoms. However, it is difficult to install this system anywhere and  
25 repetitively provide the treatment in practice, because the cost is high and no practical  
26 signal processing techniques have existed so far to extract FC-related features from EEG,  
27 particularly when no physical forward models are available. In this regard, stacked  
28 pooling and linear components estimation (SPLICE; Hirayama et al., 2017), recently  
29 proposed as a multilayer extension of independent component analysis (ICA) and related  
30 independent subspace analysis (ISA; Hyvärinen & Hoyer, 2000), can be a promising  
31 alternative, although its application to the resting-state EEG have never been  
32 investigated so far. We expected that if the extracted EEG network features were  
33 correlated with fMRI network activity corresponding to DMN or ECN, it may help to  
34 modulate the target FC in the EEG-based neurofeedback training.

35 Here, we describe a real-time EEG neurofeedback paradigm for improvement of  
36 depressive symptoms by using an EEG network features estimated by SPLICE. We  
37 hypothesized upregulation of the dorsolateral prefrontal cortex (DLPFC)/middle frontal  
38 cortex or downregulation of precuneus/posterior cingulate cortex (PCC) related to fMRI  
39 biomarker for depression (Ichikawa et al., Sci Rep, 2020) should specifically predict  
40 decreases in depressive symptoms during the neurofeedback training. We conducted a  
41 single-blind design for neurofeedback group (n=8; NF group) and sham group (n=9)  
42 groups for three days. To this end, we found large effect size in the rumination response

43 scale score (total, brooding and reflection) in the comparison between NF and sham  
44 groups. Additionally, brain signals of the tasked fMRI (a contrast of 2-back > 0-back) in  
45 the neurofeedback group were significantly decreased in the right cuneus and DLPFC  
46 compared to the control group. We demonstrated a feasibility of EEG neurofeedback  
47 treatment for depressive symptoms using EEG network features extracted by SPLICE in  
48 the subclinical trials.

49

50 **Keywords: neurofeedback, depression, EEG-fMRI, blind source separation,**  
51 **functional connectivity**

52

53

## 54 **1. Introduction**

55 Advanced treatments for depressive symptoms have been studied using brain or  
56 physiological measurement instead of traditional treatments of medicine. One of the  
57 noninvasive ways to accurately monitor brain activity that may represent depressive  
58 symptoms is functional MRI (fMRI) because of its high spatial resolution even around  
59 deep brain areas. Several groups have proposed real-time fMRI neurofeedback  
60 paradigms that can be used to train the brain of people with depressive symptoms to  
61 function more like those of healthy individuals (Young et al., 2017; Yamada et al., 2017;  
62 Taylor et al., 2021). During the intervention of the real-time neurofeedback, participants  
63 can control their own brain activity to be closer to the healthy condition, and then reduce  
64 their depressive symptoms.

65

66 The effectiveness of real-time fMRI neurofeedback for depressive symptoms has been  
67 proven by several studies. However, it is difficult to install this system anywhere and  
68 repetitively provide the treatment in practice because of the expensive costs. Instead of  
69 fMRI, therefore, alternative approaches to the real-time neurofeedback have been  
70 proposed using electroencephalography (EEG), such as those based on frontal alpha  
71 asymmetry (Wang et al., 2019), peak alpha frequency (Yu et al., 2020), and alpha-theta  
72 ratio (Cheon et al., 2016). The frontal alpha asymmetry EEG neurofeedback has been  
73 examined to modulate left-side alpha power associated with brain activity in the left  
74 amygdala. EEG has many practical benefits such as reasonable cost, high-temporal  
75 resolution, and less physical constraints while it has a detriment of low-spatial resolution.  
76 Several 'proof of concept' studies have already shown the potential effectiveness of real-  
77 time EEG-fMRI neurofeedback paradigms for depression (Zotев et al., 2014; Zotев et al.,

78 2016; Zotev et al., 2020) and improved the reliability of EEG signature for neurofeedback.

79 In these types of neurofeedback training (NF training), participants are required to

80 imagine their autographic memory of happy events and to increase brain activity in the

81 left amygdala, and frontal alpha asymmetry at the same time. Thus, the purpose of these

82 neurofeedback is to control the left amygdala and related brain regions similar to the

83 healthy state.

84

85 Recently, a new type of approach has also been developed for fMRI neurofeedback of

86 depression based on regularization of functional connectivity (FC) between executive

87 control network (ECN) and default mode network (DMN) (Yamada et al., 2017; Taylor et

88 al., 2021; Tsuchiyagaito et al., 2020). In healthy individuals, the time courses of ECN and

89 DMN are often observed to be anticorrelated, and it is associated with the distinction

90 between internal (e.g., own thoughts) and external (e.g., perceptions of external

91 environment) contents. In contrast to the health individuals, the case of depressive

92 disorder tends to dysbalanced, and then it increases self-focus (rumination, guilt, fear)

93 and decreases environment-focus (social withdrawal, psychomotor retardation) (Northoff,

94 2016; Drysdale et al., 2017). This fact is clarified in the fMRI biomarker, which was

95 identified melancholic depression with data-driven approaches (Ichikawa et al., 2020;

96 Yamashita et al., 2020). In particular, FC between the dorsolateral prefrontal cortex

97 (DLPFC)/middle frontal gyrus (mFG) in ECN and the precuneus/posterior cingulate

98 cortex (PCC) in DMN was shown to be necessary. Given an evidence of fMRI biomarker,

99 this type of technique, called FC neurofeedback (FCNef), with a precise localization of

100 the target connection, has shown a great promise for treatments of depression.

101

102 However, in contrast to the real-time fMRI feedback or FCNef, an EEG neurofeedback  
103 using network features have been poorly investigated. This is mainly because no  
104 practical signal processing techniques have existed so far to extract FC-related features  
105 from EEG, particularly when no physical forward models are available. In fact, most  
106 studies have used sensor-level features such as time-instant powers of particular  
107 frequency bands or sought to extract source-level features by a blind-source separation  
108 (BSS) technique such as independent component analysis (ICA). Neither method is not  
109 designed to detect EEG features that reflect FC and modular organization related to the  
110 resting-state networks. To extract EEG network features related to the FC observed in  
111 fMRI, a new BSS-based technique is strongly required, which should be combined with  
112 a signal model that explicitly assumes a network structures at the source level. In this  
113 regard, stacked pooling and linear components estimation (SPLICE; Hirayama et al.,  
114 2017), recently proposed as a multilayer extension of ICA and related independent  
115 subspace analysis (ISA; Hyvärinen & Hoyer, 2000), can be a promising alternative,  
116 although its application to the resting-state EEG have never been investigated so far. We  
117 expected that if the extracted EEG network features were correlated with fMRI network  
118 activity corresponding to DMN or ECN, it may help to modulate the target FC in the EEG-  
119 based NF training.

120

121 Here, we describe a real-time EEG neurofeedback paradigm for improvement of  
122 depressive symptoms by using an EEG network features estimated by SPLICE. We  
123 hypothesized upregulation of the DLPFC/mFC or downregulation of precuneus/PCC  
124 should specifically predict decreases in depressive symptoms during the NF training. To  
125 investigate this, we ran subclinical participants with depressive symptoms in an EEG-

126 neurofeedback paradigm for three days targeting regions (DLPFC/mFC or  
127 precuneus/PCC) in a single-blind design while referring a FCNef paradigm (Yamada et  
128 al., 2017; Taylor et al., 2021). For training of the SPLICE model, we conducted two-days  
129 EEG-fMRI experiments for each participant to simultaneously acquire EEG-fMRI data at  
130 resting and during N-back task. After modeling of SPLICE from the resting-state data,  
131 we selected EEG network features which was correlated with fMRI signal in the DLPFC  
132 or precuneus/PCC for NF training. Scores on the Beck Depression Inventory-II (BDI-II;  
133 Beck et al., 1996) and the Rumination Response scale (RRS; Hasegawa, 2013) were  
134 measured before and after the NF training. To this end, we evaluated effect size of  
135 difference between pre- and post-training among neurofeedback and sham groups, then  
136 described a feasibility of EEG-neurofeedback using EEG network features relevant to  
137 fMRI network information.

138

## 139 **2 Materials and Methods**

### 140 **2.1 SPLICE**

141 SPLICE (Hirayama et al., 2017) is a multilayer extension of ICA based on a probabilistic  
142 model that simplifies the generative process of EEG. Let  $\mathbf{x}$  and  $\mathbf{s}$  denote the vectors of  
143 EEG measurements and unobserved source signals, respectively, at a single time point.  
144 Then, we assume a linear model (first layer) similar to ICA, given by

$$145 \quad \mathbf{x} = \mathbf{A}\mathbf{s}, \quad (1)$$

146 where mixing matrix  $\mathbf{A}$  is square and invertible; the inverse  $\mathbf{W} = \mathbf{A}^{-1}$  is called demixing  
147 matrix. Both  $\mathbf{x}$  and  $\mathbf{s}$  are zero-mean, without loss of generality, by subtracting the sample  
148 mean in advance from original data vectors. Note that the sources (i.e., entries in  $\mathbf{s}$ ) lacks  
149 explicit physical mapping to the cortex, but they can still be interpretable as reflecting

150 cortical activations based on their associated topographies (i.e., corresponding columns  
151 of  $\mathbf{A}$ ), which is exactly the same case as ICA. For mathematical convenience, the number  
152 of sources,  $d$ , is assumed to be the same as the dimensionality of  $\mathbf{x}$ ; in practice, we apply  
153 PCA beforehand to determine an appropriate number of sources as customary done in  
154 ICA.

155

156 The additional layers, on top of the first linear layer, are introduced to model statistical  
157 dependency among the sources and parametric structures behind it. Specifically,  
158 SPLICE introduces 1) functional modularity of sources and 2) intrinsic correlations  
159 (coactivations) among modules, into the multilayer generative model. The both are  
160 reasonable assumptions in particular for the resting-state EEG data, because cortical  
161 activity at rest is known to exhibit functional organization with multiple modules (e.g.,  
162 resting-state network), often mutually correlated or anticorrelated.

163

164 Formally, we divide the  $d$  first-layer sources into  $m$  modules  $\mathbf{s}_{[j]}$  without overlapping, where  
165  $\mathbf{s}_{[j]}$  denotes the vector consisting of  $d_j$  sources belonging to module  $j$  ( $d = \sum_{j=1}^m d_j$ ).  $\mathbf{s}_{[j]}$   
166 represents a  $d_j$ -dimensional subspace spanned by the corresponding columns in  $\mathbf{A}$ . Then,  
167 we assume that modules  $\mathbf{s}_{[j]}$  have mutually correlated (squared) L2-norms  $\|\mathbf{s}_{[j]}\|^2$ ,  
168 generated by an additional ICA-like linear model with pointwise nonlinearity, such that

169 
$$\|\mathbf{s}_{[j]}\|^2 = F_j^{-1}([\mathbf{A}'\mathbf{s}']_j), j = 1, 2, \dots, m, \quad (2)$$

170 Where an appropriate link function  $F_j$  is used for convention between nonnegative (norm)  
171 and real random variables (we set  $F_j = \log$  in our analysis);  $\mathbf{A}'$  and  $\mathbf{s}'$  are invertible mixing  
172 matrix and source vector (and  $\mathbf{W}' := \mathbf{A}'^{-1}$  is demixing matrix) of this layer, and  $[\cdot]_j$  denotes  
173  $j$ -th entry of a vector. Given the norms, every  $\mathbf{s}_{[j]}/\|\mathbf{s}_{[j]}\|$  is assumed to be uniformly



174 distributed on a unit hypersphere, independently of any other random variables, which  
175 makes the model non-informative except for the distribution of the norms. Note that the  
176 model can actually be recursively extended to have additional layers to further model the  
177 dependency in higher-layer sources (Hirayama et al., 2017). In the present study,  
178 however, we simply assume Eq.(2) to be the top layer. The entries in  $\mathbf{s}'$  are thus assumed  
179 to be independent of each other, given a typical prior in ICA (e.g., the one corresponding  
180 to the standard *tanh* nonlinearity).

181

182 To recapitulate the model, we illustrate a conceptual diagram of SPLICE in Figure 1. The  
183 model consists of three layers, two linear layers and an intermediate L2-pooling layer  
184 calculating the norms. Here, we define  $\mathbf{x}' := \mathbf{A}'\mathbf{s}'$ . If the highest layer  $\mathbf{A}'$  is not diagonal,  
185 modules are mutually independent and the model in fact reduces to that of independent  
186 subspace analysis (Hyvärinen & Hoyer, 2000). If not diagonal, the modules are not  
187 independent and thus expected to be suitable to represent correlated or anticorrelated  
188 cortical modules. Note that modeling non-diagonal  $\mathbf{A}'$  is not only affect the higher layer  
189 but also influences the first layer through the joint learning of the two layers (see below),  
190 because it makes a different (possibly improved) prior assumption on the first-layer  
191 sources from that of ICA or ISA.

192

193 A striking property of SPLICE is that both parameter estimation (learning) and posterior  
194 inference on latent variables can be performed in a principled manner, without resorting  
195 to any approximative techniques or heavy numerical computation. Learning is done  
196 based on conventional maximum likelihood (ML) estimation. The corresponding loss  
197 function, i.e., negative log-likelihood for a single datum  $L := -\ln p(\mathbf{x}) + \text{const.}$ , is analytically

198 given by

$$200 \quad L = \sum_{k=1}^m \mathbf{H}_k \left( \sum_{k=1}^m w'_{kj} \mathbf{F}_j \left( \|\mathbf{W}_{[j]}\mathbf{x}\|^2 \right) \right) - \ln|\det\mathbf{W}'| + \sum_{k=1}^m \mathbf{G}_j \left( \|\mathbf{W}_{[j]}\mathbf{x}\|^2 \right) - c \ln|\det\mathbf{W}|$$

199 (3)

201 where  $\mathbf{H}$  and  $\mathbf{G}$  are functions derived from the prior distribution on  $\mathbf{s}'$  and link function  $\mathbf{F}_j$   
202 and the dimensionality of every module (subspace)  $d_j$  is adaptively determined before  
203 the ML estimation using a clustering-like technique (see Hirayama et al., 2017 for details).

204

205 Once demixing matrices  $\mathbf{W}$  and  $\mathbf{W}'$  are learned, one can readily invert the generative  
206 process by computing  $\mathbf{s} = \mathbf{W}\mathbf{x}$  and  $\mathbf{s}' = \mathbf{W}'\mathbf{x}'$ , with the L2-pooling  $\|\mathbf{s}_{[j]}\|^2$  (followed by  $\mathbf{F}_j$ )  
207 between them. In practice, the pooled outputs (squared norm) may fluctuate too heavily  
208 due to the noisy nature of EEG. Thus, as a slight extension of the original SPLICE, we  
209 also implemented the L2-pooling across successive time points for smoothing, which  
210 was done in a principled manner by modifying the model and likelihood, so that the top  
211 linear layer determines the L2 norm of  $\mathbf{s}_{[j]}$  that now concatenates several instances of the  
212  $d_j$  sources across time points. Note that here, the pooling just means taking the sum of  
213 squares (of the filtered outputs). Thus, the squared module norm essentially gives the  
214 total power or energy of a source module's activity. We therefore focused primarily on  
215 the estimated module norms as the main output of the analysis, rather than the top-layer  
216 sources  $\mathbf{s}'$  which the multilayer computation eventually produces, because we expected  
217 to associate EEG features with the activity of cortical modules.

218

219 (Figure 1 is inserted around here)

## 220 **2.2 Experiment procedures**

### 221 **2.2.1 Participants**

222 The flow of this experiment was summarized in Figure 2. All participants were recruited  
223 by screening questionnaires and clinician assessment (n = 102: 49 females, 53 males;  
224 mean age = 29.88 ± 9.8 years old). To meet criteria for participation in the EEG-fMRI  
225 simultaneous recording experiment, participants must have (a) no inclination of suicidal  
226 thoughts, as measured by a question on the BDI, (b) no current or recent mental or  
227 psychiatric diseases, (c) understanding of the Japanese language. All received cash  
228 remuneration for their involvement after the experiment. Twenty eight participants without  
229 psychiatric disease in the past could proceed to the EEG-fMRI experiment for two days.  
230 We excluded participants who caused body movement in the MRI scanner. Finally,  
231 seventeen participants completed the NF training experiment for four days. All  
232 participants provided written informed consent prior to the experiment. This study was  
233 approved by the ethical committee of the Advanced Telecommunications Research  
234 Institute International (ATR) and followed the Declaration of Helsinki.

235

236 (Figure 2 is inserted around here)

237

### 238 **2.2.2 Psychological questionnaires**

239 In the Screening experiment, all participants completed self-report questionnaires that  
240 included demographic characteristics, the Beck Depression Inventory II (BDI-II),  
241 Rumination Response Scale (RRS), Obsessive-Compulsive Inventory (OCI), Autism-  
242 Spectrum Quotient (AQ), State-Trait Anxiety Inventory (STAI2), Snaith-Hamilton  
243 Pleasure Scale (SHAPS), Schizotypal Personality Questionnaire (SPQ), Barratt

244 Impulsiveness Scale 11 (BIS-11), Zimbardo Time Perspective Inventory (ZTPI), and were  
245 rated on the 21-item Hamilton Depression Rating Scale (HAM-D), the Hamilton Anxiety  
246 Rating Scale (HAM-A), and Structured Clinical Interview for DSM-IV-TR Axis disorders  
247 (SCID). To evaluate the effectiveness of the NF training, participants completed BDI-II,  
248 RRS, OCI, AQ, STAI2, BIS-11, and ZTPI on Day 1 (Visit 4) and Day 4 (Visit 7) in the NF  
249 training experiment.

250

### 251 **2.2.3 N-back task**

252 Participants had performed N-back tasks in the screening (Visit 1) and the NF training  
253 experiment (Day 1, Day 4) outside the MRI scanner as behavioral experiments. The N-  
254 back task was controlled by using Presentation ® software (Version 18.0,  
255 Neurobehavioral Systems, Inc., Berkeley, CA) and can be viewed at a display or a screen.  
256 At the beginning of each session, participants had started a N-back task by pressing the  
257 response button when they were ready. They had been instructed to simply focus on this  
258 and relax. In each session, subsequent to the rest period for 30 s, there were four blocks  
259 of the N-back task, with the task ‘rule’ changing from block-to-block (order randomized  
260 within and between sessions). At the beginning of each block, written instructions were  
261 first presented on display to inform participants of the current ‘rule’ and this was followed  
262 by 64 trials in which this ‘rule’ should be applied. On each trial, a fixation for (1300 ms)  
263 and then a number between 1-9, for 200 ms was presented centrally on display. In the  
264 ‘0-back’ block, the rule was to press the response button on the current trial if the number  
265 that appeared on screen was ‘0’. In the ‘1-back’, ‘2-back’, ‘3-back’ blocks, the rule was  
266 to press the response button on the current trial if the number that appeared on display  
267 was the same as the number that had been presented on display one, two, or three trials

268 beforehand, respectively. The participants completed two sessions of this task about 13  
269 min.

270

271 In the EEG-fMRI experiment, they also conducted the N-back task with EEG recording  
272 only and EEG-fMRI simultaneous recording. At the beginning of each session, they first  
273 had a rest-period, where they saw a black fixation cross which was presented on the  
274 screen for 30 s. In each session, subsequent to the rest period, there were six blocks of  
275 the N-back task (0-, 1-, and 2-back) with the task ‘rule’ changing from block-to-block  
276 (order randomized within and between sessions). At the beginning of each block, written  
277 instructions were first presented on display to inform participants of the current ‘rule’ and  
278 this was followed by 20 trials in which this ‘rule’ should be applied as well as the task for  
279 the behavioral experiment. A “rest” period (identical to the one at the beginning of the  
280 session) was inserted halfway through (between block 3 and block 4 of) each session.  
281 Participants’ task was to follow the current ‘rule’ to make as many correct responses as  
282 possible.

283

### 284 **2.3 Data acquisitions**

285 For a general schematic of the experimental procedure, see Figure 2.

286 MRI data were required with a 3T Siemens scanner, MAGNETOM Verio (Siemens,  
287 Erlangen, Germany) with a Siemens 12-channel head coil. High-resolution, T1-weighted  
288 structural images (TR = 2250 ms, TE = 3.06 ms, flip angle = 9 deg, inversion time = 900  
289 ms, matrix = 256 x 256, 208 sagittal slices, 1 mm isotropic) were acquired for  
290 normalization to a standard brain for echo planar image (EPI) registration purpose.  
291 Images of BOLD signal such as fMRI data, were acquired with an EPI sequence (TR =

292 2450 ms, TE = 30 ms, flip angle = 80 deg, matrix = 64 × 64, field of view = 192 mm, slice  
293 thickness = 3.2 mm, 35 axial slices, scan sequence: ascending). The durations of a  
294 single session were 6 min 7 s (150 volumes) for the resting state, 5 min 45 s (141  
295 volumes) for the N-back task.

296

297 Scalp EEG signals were recorded with an MR-compatible amplifier (BrainAMP MR plus,  
298 Brain Products GmbH, Germany) and EEG electrode cap (BrainCap MR, Brain Products  
299 GmbH, Germany) providing 63 EEG channels and 1 electrocardiogram (ECG) channel.  
300 The EEG electrodes were placed according to the modified International 10-10 system.  
301 The ground electrode and on-line reference electrode were placed on AFz and at FCz,  
302 respectively. The impedance of all electrodes was kept lower than 10 kΩ throughout the  
303 experiment. The ECG electrode was placed on the back of participants to obtain the  
304 electrocardiographic data and subsequently correct ballistocardiographic artifacts. Raw  
305 recording data was sampled at 5 kHz with a bandpass filter between 0.1 and 250 Hz  
306 using the Brain Vision Recorder (Brain Products GmbH, Germany). The amplifier system  
307 was set beside the subject's head within the scanner during fMRI scanning. To achieve  
308 phase synchronization clocks for digital sampling between the MRI data and the EEG  
309 system, the EEG system clock was synchronized with a SyncBox device (Brain Products  
310 GmbH, Germany) and the MRI scanner's 10 MHz master synthesizer. The scanner also  
311 delivered each TR trigger signal that marked the onset time of every fMRI volume  
312 acquisition. These markers were used for fMRI scanning artifact correction of the EEG  
313 data.

314

315 In the EEG-fMRI experiment, EEG signals were taken in the soundproof shield room,

316 and then EEG signals and MRI data were simultaneously taken in the MRI scanner for  
317 two days. First, each participant completed EEG measurement of the resting-state with  
318 two sessions and the N-back task (0-, 1-, 2-back) with two sessions in the soundproof  
319 shield room. A single session of the resting-state EEG took five minutes, and a single  
320 session of the N-back task took about six minutes. Second, participants moved to the  
321 MRI scanner and completed the resting-state (two sessions), the N-back task (two  
322 sessions), T1-weighted structural image scan, and the resting state (two sessions).  
323 Finally, four sessions of EEG data for the resting-state and the N-back task, eight  
324 sessions of EEG-fMRI data for the resting-state, four sessions of the EEG-fMRI data for  
325 the N-back task were taken to estimate the SPLICE filter for the neurofeedback.

326

327 In the NF training experiment, EEG signals were taken in the soundproof shield room  
328 from Day 1 to Day 3, and EEG-fMRI data were taken in the MRI scanner at Day 4 as  
329 well as the EEG-fMRI simultaneous recording experiment. In the NF training (Day 1, 2  
330 and 3), the resting-state EEG took five minutes, then each participant conducted the NF  
331 training for 9 min in a single session and completed five sessions.

332

333 In the EEG-fMRI data acquisition, the visual stimuli were projected on an opaque screen  
334 set inside the scanner via a (DLA-X7-B, JVC; frame rate = 60 Hz) projector and a mirror  
335 system. Participants responded to the stimuli using MRI compatible response pads  
336 (HHSC-2 × 2, Current Designs, Inc., PA, USA).

337

338 (Table1 is inserted around here)

339

## 340 **2.4 Data analysis**

### 341 **2.4.1 Preprocess of fMRI**

342 The flow of preprocessing of EEG and fMRI data and its integration was illustrated in  
343 Figure 3.

344

345 We followed a preprocessing protocol from a previous study (Ogawa et al., 2018). The  
346 data were processed using SPM8 (Wellcome Trust Centre for Neuroimaging). The first  
347 four volumes were discarded to allow for T1 equilibration. The remaining data were  
348 corrected for slice timing and realigned to the mean image of that sequence to  
349 compensate for head motion. Next, the structural image was coregistered to the mean  
350 functional image and segmented into three tissue classes in the MNI space. Using the  
351 associated parameters, the functional images were normalized and resampled in a  $2 \times$   
352  $2 \times 2$  mm grid. Finally, they were spatially smoothed using an isotropic Gaussian kernel  
353 of 8 mm full-width at half maximum.

354

355 For each participant, we extracted fMRI time courses within each ROI. To remove several  
356 sources of spurious variance along with their temporal derivatives, linear regression was  
357 performed, including six motion parameters in addition to averaged signals over gray  
358 matter, white matter, and cerebrospinal fluid. Furthermore, to reduce spurious changes  
359 caused by head motion, the data were checked by a method that reduces motion-related  
360 artifacts. A high-pass filter ( $< 0.008\text{Hz}$ ) was applied to these sets of time courses prior to  
361 the following regression procedure.

362

363

(Figure 3 is inserted around here)



364

#### 365 **2.4.2 EEG-fMRI integration analysis for selection of a module for NF training**

366 To extract EEG network features, SPLICE model was optimized from the resting-state  
367 EEG data of simultaneously recorded with fMRI with leave-one-session out cross  
368 validation for each individual. Prior to training of the SPLICE model, the raw EEG data  
369 were cleaned as follows: remove the fMRI scanning and ballistocardiographic artifacts  
370 using Brain Analyzer (Brain Products); apply a bandpass filter between 8 and 12 Hz such  
371 as alpha band by EEGLAB (Delorme and Makeig, 2004). We decided to reduce 63, 20,  
372 and 20 dimensions for the first layer (sources), second layer (modules), and third layer  
373 (top-level ICs), respectively. We estimated EEG network features during N-back task  
374 through the SPLICE model, and then downsampled at 5 Hz. The EEG network features  
375 were convoluted with the hemodynamic response function (HRF) and decimated to  
376 match the time instant of fMRI signal. To evaluate correlation analysis with fMRI signal  
377 in the general linear model (GLM, SPM12), the design matrix consisted of EEG network  
378 features, such as the output of twenty modules to identify whether a statistical cluster  
379 was existed in the DLPFC/mFC or PCC/Precuneus thresholding p-value  $< 0.001$ ,  
380 uncorrected and cluster level  $p < 0.05$  corrected by Family-Wised Error (FWE). Five  
381 participants whom a cluster was found in the DLPFC/mFC performed to upregulate the  
382 EEG network features, and three participants whom a cluster was identified in the  
383 PCC/precuneus performed to downregulate the EEG network feature in the NF training.  
384 Of course, the participants did not know upregulation/downregulation in the NF training.

385

#### 386 **2.5 Neurofeedback protocol**

387 A real-time neurofeedback system consisted of a software, OpenViBE (v1.0.0, Renard

388 et al., 2010) for the real-time EEG signal acquisition, feedback module programed by  
389 MATLAB, and Brain Amp MR (Brain Products) with 63-ch EEG electrode cap. EEG raw  
390 signals were acquired at 500 Hz through Brain Amp MR and OpenViBE Acquisition  
391 Server. In the interactive GUI, OpenViBE Designer, the EEG data was applied a  
392 bandpass filter between 8 and 12 Hz and electrooculography artifact removal (e.g.,  
393 blinking, eye movement) using online recursive ICA (ORICA; Hsu et al., 2016). Afterward,  
394 the signals were put into the MATLAB wrapper that predicted EEG network features by  
395 the optimized SPLICE model. According to the selected module of SPLICE in advance,  
396 an L2-norm of the module was estimated as a targeting EEG network feature, and then  
397 displayed a feedback score depending on a task design. In this process, an output of the  
398 selected modules was downsampled at 5 Hz.

399

400 In the NF training, all participants completed a 5-min resting state EEG recording and  
401 five neurofeedback sessions. We collected twenty trials in a single session. A single trial  
402 consisted of 'rest' for 6 s, 'induction' for 10 s, and 'feedback' for 4 s. Feedback was  
403 calculated as a score (-1 to 1) which was presented as a circle on monitor (Figure 4). For  
404 the NF group, the score was a difference of the mean power of between 'induction' and  
405 'rest' period in logarithm scale into -1 to 1 in eleven steps (resolution = 0.2; if the score  
406 was less than -1 or more than 1, a circle size was minimum or maximum). On the other  
407 hand, for the sham group, the score was randomly generated between -1 to 1. On each  
408 trial, during the 'induction' period, participants had been instructed to try their best to "do  
409 something with their brain" to get the best feedback possible. During the instructions, a  
410 list of example strategies had been provided (e.g., mental calculation, recalling words),  
411 so that participants understood what was meant by "do something with your brain". It is

412 possible that this may have influenced what the participants did. Nonetheless,  
413 participants were not told to use any explicit strategies on any given trial or session,  
414 meaning that they had to learn how to get favorable feedback via trial and error during  
415 the task. None of these related to depression or the N-back task.

416

417 To randomly divide participants into two training groups (NF and sham), we confirmed  
418 no significant differences of depressive symptoms with two-sample t-test (BDI-II:  $p =$   
419  $0.257$ ; RRS:  $p = 0.317$ ), but also other scores (OCI:  $p = 0.264$ ; AQ:  $p = 0.815$ ; STAI2(trait):  
420  $p = 0.512$ ) as control shown in Table 2.

421

422 (Figure 4 and Table 2 are inserted around here)

423

## 424 **3. Results**

### 425 **3.1 The effect of NF training on scores of psychological questionnaires**

426 In comparison between the NF group and the sham group, we calculated the effect sizes  
427 (Cohen's  $d$ ) from the differences of scores between post- and pre-NF for BDI-II and RRS.

428 In Table 3, we summarized the average (and standard deviation) scores on the  
429 questionnaires across two groups. About the scores associated with depressive  
430 symptoms, we found large effect sizes in RRS (total:  $-0.722$ , brooding:  $-0.626$ , reflection:

431  $-1.050$ ), but did not find large effect sizes in the BDI-II (total:  $0.184$ ). In other scores not

432 directly related with depressive symptoms, we also found large effect sizes in AQ (total,  
433 attention switching), OCI (total, obsessing) in Supplemental Table1. As another effect,

434 we found an increasing of STAI2 (trait) in the NF group compared to the sham group, but

435 not in the STAI2 (state). Our results suggest that our NF training may affect to reduce

436 rumination in particular, subscales such as “brooding” and “reflection”.

437

438 (Table3 is inserted around here)

439

### 440 **3.2 The effect of the NF training on the fMRI signal**

441 We evaluated effects on neural representation due to the NF training in a comparison of  
442 fMRI data during N-back task recorded on Visit 2 & 3 and Visit 7 (Day4). In fact, we did

443 not collect the EEG-fMRI data on Visit 4 (Day1), because of practical reasons (scheduling

444 of experiment and less burden on participants), therefore, we decided to compare the

445 fMRI data on Visit 2 & 3 as pre-NF training and Visit 7 as post-NF training in this analysis.

446 In order to statistically evaluate the interactions of groups (NF, sham) and time (Visit 2&3,

447 Visit 7), we applied a full factorial analysis for fMRI data during N-back task using SPM

448 12. Two clusters with a contrast of 2-back > 0-back were identified at the right angular

449 gyrus and superior frontal gyrus 2 (labelled by AAL toolbox; thresholding by p-value <

450 0.001, uncorrected and cluster level  $p < 0.05$  corrected by Family-Wised Error (FWE,

451 cluster size > 244 voxels; Figure 5 and Table 4). About behavioral performance of N-

452 back task during the EEG-fMRI simultaneous recording, we did not find significant effects

453 observed in  $d'$  or hit rates due to the NF training because of ceiling effect (Table 5). It is

454 suggested that the neural basis of high cognitive load (2-back) could be processed with

455 less effort in these regions due to the NF training.

456

457 (Table 4, Table 5, and Figure 5 are inserted around here)

458

### 459 **3.3 The effect of the NF training on EEG parameters**

460 Participants in the NF group were given feedback scores calculated by online EEG NF  
461 system on each trial end, therefore, we illustrated changes of the feedback scores across  
462 three days (Day1 to Day3, Figure 6). Four subjects showed an increased mean of the  
463 feedback scores at Day3 higher than the one at Day1, but other subject did not show  
464 training effect in the feedback score. From this result, we did not find an obvious training  
465 effect represented in the feedback score.

466

467 (Figure 6 is inserted around here)

468

## 469 **4. Discussion**

470 In this study, we investigated the feasibility of an advanced EEG NF training targeting  
471 depressive symptoms, in particular, rumination related brain regions in subclinical  
472 participants. Before the NF training, EEG network features estimated by SPLICE were  
473 evaluated with fMRI data correlated with upregulation in the DLPFC/mFG or  
474 downregulation in the PCC/precuneus according to the previous biomarker studies  
475 (Ichikawa et al., 2020; Yamashita et al., 2020). To this end, we found large effect sizes in  
476 RRS (total, brooding and reflection) in the comparison between NF and sham groups.  
477 Here we start to discuss effect of our EEG NF protocol with SPLICE, its effect to neural  
478 basis associated with cognitive function, and methodological limitations of this study.

479

### 480 **4.1 Improvement of depressive symptoms due to EEG NF training**

481 Our hypothesis is that functional regularization in DMN or ECN may contribute the  
482 improvement of depressive symptoms, in particular, represented in BDI and RRS, we

483 then found large effect size on RRS (total, brooding and reflection) compared the NF  
484 group with the sham group, but not on BDI. The FCNef protocol of Taylor et al. (2021) for  
485 four days' training with fMRI showed significant reduction of BDI and brooding in RRS.  
486 In their protocol, targeting FC between the left DLPFC/mFG and the left PCC/precuneus  
487 was precisely localized by fMRI during N-back task in the first day of the training.  
488 Feedback scores were directly calculated from the targeting FC in real time under the  
489 training, therefore, it may help for participants to control the feedback scores.  
490 Tsuchiyagaito et al. (2021) also investigated the feasibility of FCNef targeting on FC  
491 between the left precuneus and right temporoparietal junction, and found large effect  
492 size in difference between the NF and sham groups at the post-NF training on state-  
493 rumination assessed by VAS, but not in RRS. Our result was consisted with the FCNef  
494 study of Taylor et al. (2021) that showed improvement of depressive symptoms  
495 associated with rumination, in particular, brooding. Brooding factor is specifically thought  
496 to be associated with depression and mistake concern (Treyner et al., 2003; Hasegawa  
497 2013), which is considered a specific trait of melancholic depression. The EEG network  
498 feature estimated from SPLICE was not directly calculated from the target FC like FCNef  
499 (Yamada et al., 2017; Taylor et al., 2021). However, we confirmed the statistical  
500 equivalence between EEG network features and fMRI data in the selection process of  
501 SPLICE module. It may approximately predict the network activity associated with DMN  
502 or ECN from EEG data and help to normalize the targeting brain region.

503

504 Advantages of our NF protocol are fMRI-informed feature selection and not needed fMRI  
505 scanning in the NF training. One of the advanced approaches are simultaneous real-  
506 time fMRI and EEG NF (Zotev et al., 2020; Cury et al., 2020). A NF protocol of Zotev et

507 al. (2020) simultaneously displayed bars of fMRI signals in the left amygdala and frontal  
508 EEG asymmetry in the alpha band and required to upregulate these bars involved with  
509 positive autographical memory. They conducted their NF protocols for major depressive  
510 disorder (MDD) patients and demonstrated through proof-of-concept to reduce  
511 depressive symptoms, the profile of mood state (POMS) and STAI. This method can  
512 directly modulate the target regions precisely, however, the costs of these treatments are  
513 very expensive, and people who has claustrophobia cannot be applied. Instead of the  
514 simultaneous real-time fMRI and EEG NF, our approach of EEG NF training using  
515 SPLICE that extract EEG network features using SPLICE showed the feasibility of an  
516 advanced treatment for depressive symptoms with low cost, and applicable in the  
517 realistic environment (not required MRI equipment).

518

#### 519 **4.2 Training effect represented in fMRI activation during N-back task**

520 In a comparison between pre- and post-NF, we found an interaction of brain activity with  
521 group (NF, sham) and time (pre, post) in the right angular gyrus and superior frontal gyrus  
522 with a contrast of 2-back > 0-back. These brain regions were part of ECN and activated  
523 greater in MDD patients than in healthy individuals (Fitzgerald et al., 2008). Though the  
524 NF training, participants in the NF group regularized their own brain activity in the close-  
525 loop process, therefore, the calculation cost in the right frontal and parietal regions may  
526 be decreased even though the same cognitive load. In contrast, participants in the sham  
527 group could not succeed to make efforts to get higher scores in the NF training, and may  
528 be required to do something for increasing size of the green disc in the induction period.

529

530 About behavioral performance of N-back task (0, 1, 2-back) on Day 1 and Day 4, we

531 expected that the NF group should be improved due to the NF training. In the case of 0,  
532 1, 2-back condition, however, we did not find clear differences because of the ceiling effect.  
533 One of the reasons is that we did not record EEG-fMRI of 3-back task in our protocol,  
534 and we could not accurately evaluate their performance of working memory with higher  
535 load. For healthy participants, we designed short duration numeral presentation in our  
536 N-back task paradigm such as 200 ms, but this was too easy in the case of 1 and 2-back  
537 condition to see effects of the NF training. For future studies, we need to improve our N-  
538 back task protocol to correctly evaluate the work memory performance.

539

#### 540 **4.3 Methodological limitation**

541 In this study, subclinical healthy participants completed the NF training, therefore, the  
542 scores of depressive symptoms were lower than previous patient studies (Wang et al.,  
543 2019; Young et al., 2017; Zotev et al., 2020). Some participants were low scores from  
544 the beginning of the NF (Day 1) and did not show enough improvement due to the NF  
545 training because of the floor effect. Taylor et al. (2021) and Tsuchiyagaito et al. (2021)  
546 have conducted the NF training with healthy participants and is comparable to our study.  
547 One of the difficulties is recruiting appropriate participants for this experiment, in fact, we  
548 recruited about a hundred participants as screening for subclinical participants with  
549 depressive symptoms. To this end, we completed the NF training for seventeen  
550 participants, however, it was not enough number of participants to show stable statistics  
551 like Wang et al. (2019). To improve the sensitivity of pre-screening, we should conduct  
552 questionnaires not only BDI, but also Self-rating Depression Scale (SDS; Zung, 1965).  
553 For depressive symptoms, the EEG NF protocol of Wang et al. (2019) have  
554 demonstrated a proof of concept for patients, with comorbid MDD and anxiety symptoms,



555 comparing three groups, frontal alpha asymmetry (ALAY group), high-beta  
556 downregulation training (Beta group), and control. Eighty-seven patients completed 10  
557 sessions NF training, twice a week, for five weeks. To this end, ALAY and Beta group  
558 showed a reduction of BDI-II about 10 points, and a reduction of Beck Anxiety Inventory  
559 (BAI) score about eight points. Both of psychological questionnaires showed significant  
560 interaction comparing to the control group. This intensive and long-term NF training may  
561 be enough to induce large effects on depressive symptoms. In our protocol, NF training  
562 was set for three days, and healthy individuals were recruited. To consider a practical  
563 application, there is a problem of scheduling and long-term treatment to achieve this NF  
564 training. For example, a case of Taylor et al. (2021) is four-days training, Tsuchiyagaito  
565 et al. (2021) and Zotev et al. (2020) are just one-day training. In making a NF protocol,  
566 balance of training intensity and efficacy is a crucial issue, but critical point in the realistic  
567 treatment, therefore, we have to carefully design the NF experiment.

568

569 To extract EEG network features, we proposed SPLICE that extend ISA assumed  
570 hierarchical network structure in the EEG data. In the optimization process, SPLICE  
571 automatically pools several components which are highly correlated, and estimates time  
572 course of network feature including several components. For integration analysis of  
573 EEG-fMRI data, for instance, HRF-convoluted frequency powers were calculated to  
574 match time instants between EEG and fMRI data, then were applied GLM to identified  
575 brain regions or networks (Mantini et al., 2007). Another approach is combined with EEG-  
576 microstate analysis which divides four to six states based on the clustering algorithm,  
577 then identifies brain regions using correlation analysis (Brechet et al., 2019; Al Zoubi et  
578 al., 2020). These methods may achieve dimension reductions and simply describe the

579 relationship between fMRI and EEG data. However, each extracted component was not  
580 considered a network structure which already known. To quantify the accuracy of  
581 SPLICE model, we have to evaluate several conditions of EEG-fMRI data for future  
582 studies.

583

584 In summary, normalization of the targeted brain regions in the DLPFC/mFC and  
585 PCC/precuneus in the three days NF training have demonstrated reduction of depressive  
586 symptoms such as rumination in a single-blind test. EEG network features extracted by  
587 SPLICE demonstrated a feasibility of EEG NF treatment for depressive symptoms for  
588 sub-clinical healthy individuals. Our results have showed a possibility of transferable NF  
589 training from fMRI to EEG with sufficient accuracy.

590

591

## 592 **References**

593 Beck, A. T., Steer, R. A., Brown, G. K. (1996). Beck Depression Inventory-II (BDI-II) The  
594 Psychological Corporation, Harcourt Brace; Toronto.

595 Cheon, E. J., Koo, B. H., Choi, J. H. (2016). The Efficacy of Neurofeedback in Patients  
596 with Major Depressive Disorder: An Open Labeled Prospective Study. Appl  
597 Psychophysiol Biofeedback, 41 (1), 103-10.

598 Cury, C., Maurel, P., Gribonval, R., Barillot, C. (2020). A Sparse EEG-Informed fMRI  
599 model for hybrid EEG-fMRI neurofeedback prediction. Front Neurosci, 13.  
600 <https://doi.org/10.3389/fnins.2019.01451>.

601 Delorme, A., Makeig, S. (2004). EEGLAB: an open-source toolbox for analysis of single-  
602 trial EEG dynamics, J Neurosci Methods, 134, 9-21.

603 Drysdale, A.T., Grosenick, L., Downar, J., Dunlop, K., Mansouri, F., Meng, Y. et al. (2017).

- 604 Resting-state connectivity biomarkers define neurophysiological subtypes of  
605 depression. *Nat Med.* 23, 28–38.
- 606 Fitzgerald, P. B., Srithiran, A., Benitez, J., Daskalakis, Z. Z., Oxley, T. J., Kulkarni, J. et  
607 al. (2008). An fMRI study of prefrontal brain activation during multiple tasks in patients  
608 with major depressive disorder. *Hum Brain Mapp.* 29 (4), 490–501.
- 609 Hasegawa, A. (2013). Translation and initial validation of the Japanese version of the  
610 Ruminative Responses Scale. *Psychol. Rep.* 112, 716-726.
- 611 Hirayama, J., Hyvärinen, A., Kawanabe, M. (2017). SPLICE: fully tractable hierarchical  
612 extension of ICA with pooling. *PMLR*, 70, 1491-1500.
- 613 Hsu, S. H., Mullen, T. R., Jung T. P. (2016). Real-Time Adaptive EEG source separation  
614 using online recursive independent component analysis. *IEEE Trans on Neural Syst*  
615 *Rehabil Eng.* 24(3), 309-19.
- 616 Hyvärinen, A. and Hoyer, P. O. (2000). Emergence of phase and shift invariant features  
617 by decomposition of natural images into independent feature subspaces. *Neural*  
618 *Comput*, 12(7), 1705–1720.
- 619 Ichikawa, N., Lisi, G., Yahata, N., Okada, G., Takamura, M., Hashimoto, R. et al. (2020).  
620 Primary functional brain connections associated with melancholic major depressive  
621 disorder and modulation by antidepressants. *Sci Rep.* 10:3542, doi: 10.1038/s41598-  
622 020-60527-z.
- 623 Mantini, D., Perrucci, M. G., Cugini, S., Ferretti, A., Romani, G. L., Del Gratta, C. (2007).  
624 Complete artifact removal for EEG recorded during continuous fMRI using independent  
625 component analysis. *Neuroimage*, 34 82), 598-607.
- 626 Misaki, M., Tsuchiyagaito, A., Al Zoubi, O., Paulus, M., Bodurka, J., Tulsa 1000  
627 Investigators. (2020). Connectome-wide search for functional connectivity locus  
628 associated with pathological rumination as a target for real-time fMRI neurofeedback  
629 intervention, *Neuroimage Clin.*, 26(102244).
- 630 Northoff, G. (2016). Spatiotemporal psychopathology I: no rest for the brain's resting

- 631 state activity in depression? Spatiotemporal psychopathology of depressive symptoms.  
632 J Affect Disord. 190, 854–66.
- 633 Ogawa, T., Aihara, T., Shimokawa, T., Yamashita, O (2018). Large-scale brain network  
634 associated with creative insight: combined voxel-based morphometry and resting-state  
635 functional connectivity analyses. Sci. Rep. 8. doi: 10.1038/s41598-018-24981-0.
- 636 Renard, Y., Lotte, F., Gibert, G., Congedo, M., Maby, E., Delannoy, V. et al. (2010).  
637 OpenViBE: an open-source software platform to design, test and use brain-computer  
638 interfaces in real and virtual environments, Presence, 19(1), 35-53.
- 639 Spielberger, C.D. (1983). State-trait anxiety inventory for adults. Palo Alto, CA: Mind  
640 Garden.
- 641 Taylor, J. E., Yamada, T., Kawashima, T., Kobayashi, Y., Yoshihara, Y., Miyata, J. et al.  
642 (2021). Reduction of brooding and more general depressive symptoms after fMRI  
643 neurofeedback targeting a melancholic functional-connectivity biomarker. medRxiv,  
644 <https://doi.org/10.1101/2021.01.21.20248810>.
- 645 Treynor, W., Gonzalez, R., Nolen-Hoeksema, S. (2003). Rumination reconsidered: A  
646 psychometric analysis. Cognit Ther Res. 27, 248–259.
- 647 Tsuchiyagaito, A., Misaki, M., Al Zoubi, O., Tulsa 1000 Investigators, Paulus, M., Bodurka,  
648 J. (2021). Prevent breaking bad: A proof of concept study of rebalancing the brain's  
649 rumination circuit with real-time fMRI functional connectivity neurofeedback, Hum Brain  
650 Mapp., 42, 922-940.
- 651 Wang, S. Y., Lin, I. M., Fan, S. Y., Tsai, Y. C., Yen, C. F., Yeh, Y. C. et al. (2019). The  
652 effects of alpha asymmetry and high-beta down-training neurofeedback for patients with  
653 the major depressive disorder and anxiety symptoms. J Affect Disord 257, 287–96.
- 654 Yamashita, A., Sakai, Y., Yamada, T., Yahata, N., Kunimatsu, A., Okada, N. et al. (2020).  
655 Generalizable brain network markers of major depressive disorder across multiple  
656 imaging sites. PLoS Biol. 18(12), e3000966.
- 657 Yamashita, A., Sakai, Y., Yamada, T., Yahata, N., Kunimatsu, A., Okada, N. et al., (2021).

- 658 Common brain networks between major depressive-disorder diagnosis and symptoms  
659 of depression that are Validated for Independent Cohorts. *Front. Psychiatry*, 10 June  
660 2021, <https://doi.org/10.3389/fpsyt.2021.667881>
- 661 Yahata, N., Kasai, K., Kawato, M. Computational neuroscience approach to biomarkers  
662 and treatments for mental disorders. *Psychiatry Clin Neurosci.* 71, 215–237 (2017).
- 663 Yamada, T., Hashimoto, R., Yahata, N., Ichikawa, N., Yoshihara, Y., Okamoto, Y. et al.  
664 (2017) Resting-state functional connectivity-based biomarkers and functional MRI-  
665 based neurofeedback for psychiatric disorders: a challenge for developing theranostic  
666 biomarkers. *Int. J. Neuropsychopharmacol.* 20, 769-781.
- 667 Young K.D., Zotev, V., Phillips, R., Misaki, M., Yuan, H., Drevets, W. C. et al. (2014).  
668 Real-time fMRI neurofeedback training of amygdala activity in patients with major  
669 depressive disorder. *PloS One*, 9, e88785.
- 670 Young, K.D., Siegle, G., J., Zotev, V., Phillips, R., Misaki, M., Yuan, H. et al. (2017).  
671 Randomized clinical trial of real-time fMRI amygdala neurofeedback for major  
672 depressive disorder: effects on symptoms and autobiographical memory recall. *Am. J.*  
673 *Psychiatry*, 174, 748-755.
- 674 Young, K.D., Zotev, V., Phillips, R., Misaki, M., Drevets, W.C., Bodurka, J. (2018).  
675 Amygdala real-time functional magnetic resonance imaging neurofeedback for major  
676 depressive disorder: A review. *Psychiatry Clin Neurosci.* 72(7), 466–481.
- 677 Yu, S. H., Tseng, C. Y., Lin, W. L. (2020). A neurofeedback protocol for executive function  
678 to reduce depression and rumination: a controlled study. *Clin Psychopharmacol*  
679 *Neurosci*, 18 (3), 375-385.
- 680 Zotev, V., Phillips, R., Yuan, H., Misaki, M., Bodurka, J. (2014). Self-regulation of human  
681 brain activity using simultaneous real-time fMRI and EEG neurofeedback. *Neuroimage*,  
682 85, 985–95.
- 683 Zotev, V., Yuan, H., Misaki, M., Phillips, R., Young, K. D., Feldner, M. T. et al. (2016).  
684 Correlation between amygdala BOLD activity and frontal EEG asymmetry during real-  
685 time fMRI neurofeedback Training in Patients with Depression. *Neuroimage Clin*, 11,

686 224–38.

687 Zotev, V., Mayeli, A., Misaki, M., Bodurka, J. (2020). Emotion self-regulation training in  
688 major depressive disorder using simultaneous real-time fMRI and EEG neurofeedback.  
689 Neuroimage. Clin 27, 102331.

690 Zung, W. W. K. (1965). A self-rating depression scale. Arch Gen Psychiatry, 12, 63-70.  
691 doi: 10.1001/archpsyc.1965.01720310065008.

692

## 693 **Conflict of Interest**

694 The authors declare that the research was conducted in the absence of any commercial  
695 or financial relationships that could be construed as a potential conflict of interest.

696

## 697 **Author Contributions**

698 Takeshi Ogawa and Hiroki Moriya designed this study. Takeshi Ogawa and Nobuo Hiroe  
699 performed data acquisition. Takeshi Ogawa and Jun-ichiro Hirayama analyzed the data.  
700 Takeshi Ogawa, Jun-ichiro Hirayama, and Motoaki Kawanabe discussed data analysis  
701 and results. Takeshi Ogawa and Jun-ichiro Hirayama wrote the original draft.

702

## 703 **Funding**

704 This study was supported by JSPS KAKENHI Grant Number JP17H06041, JP18H05395,  
705 JP18KK0284, JP21K12620, JP21K12055, JP21H03516, the ImPACT Program of the  
706 Council for Science, Technology and Innovation (Cabinet Office, Government of Japan),  
707 CREST, JST, the MIC/SCOPE/ #192107002.

708

## 709 **Acknowledgments**

710 We thank Yoko Matsumoto for her help in recruiting participants, scheduling and  
711 conducting the experiment; Kana Inoue and Tachi Kaori for their help in screening  
712 participants in the Screening experiment; Mihoko Sato, Ayumi Yuki and Yoshiko Itakura  
713 for their supporting preparation of the EEG-fMRI and NF training experiments; Takashi  
714 Yamada for discussion to design the neurofeedback experiment. Furthermore, we would  
715 like to thank the team from the ATR Brain Activity Imaging Center (BAIC), in particular,  
716 Akikazu Nishikido and Ichiro Fujimoto for their technical support.

717

## 718 **Data Availability Statement**

719 The data that support the findings of this study are available from the corresponding  
720 author, Takeshi Ogawa, upon reasonable request.

721

## 722 **Contribution to the Field Statement**

723 Advanced treatments for depressive symptoms, such as a real-time fMRI neurofeedback  
724 have been proven by several studies. Regularization of functional connectivity (FC)  
725 between executive control network (ECN) and default mode network (DMN) during fMRI  
726 neurofeedback have been proposed to reduce depressive symptoms. However, it is  
727 difficult to install this system in practice because the cost is high and no practical signal  
728 processing techniques have existed to extract FC-related features from EEG. In this  
729 regard, stacked pooling and linear components estimation (SPLICE), recently proposed  
730 as a multilayer extension of independent component analysis and related independent

731 subspace analysis, can be a promising alternative, although its application to the resting-  
732 state EEG have never been investigated. This method may help to modulate the target  
733 FC in the EEG-based neurofeedback training. Here, we describe an EEG neurofeedback  
734 paradigm for depressive symptoms using an EEG network features estimated by  
735 SPLICE. We hypothesized upregulation of ECN or downregulation of DMN should  
736 specifically predict decreases in depressive symptoms. Finally, we found large effect size  
737 in the rumination response scale in the comparison between neurofeedback and sham  
738 groups. We demonstrated a feasibility of EEG neurofeedback treatment for depressive  
739 symptoms using EEG network features in the subclinical trials.  
740



741 **Figure legends**

742 **Figure 1.**

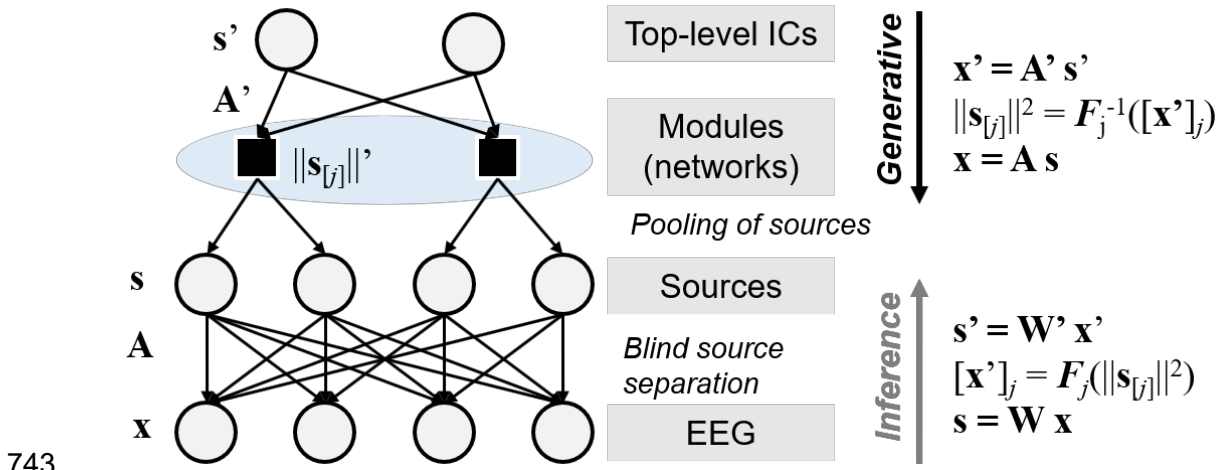

743

744 **Figure1. Structure of SPLICE.**

745 **s**: unobserved source signal; **A**: mixing matrix; **W**: demixing matrix of **A**; **x**: EEG

746 measurements; **A'**: invertible mixing matrix; **s'**: source vector; **F<sub>j</sub>**: link function; **W'**:

747 demixing matrix of **A'**.

748

749 **Figure 2.**

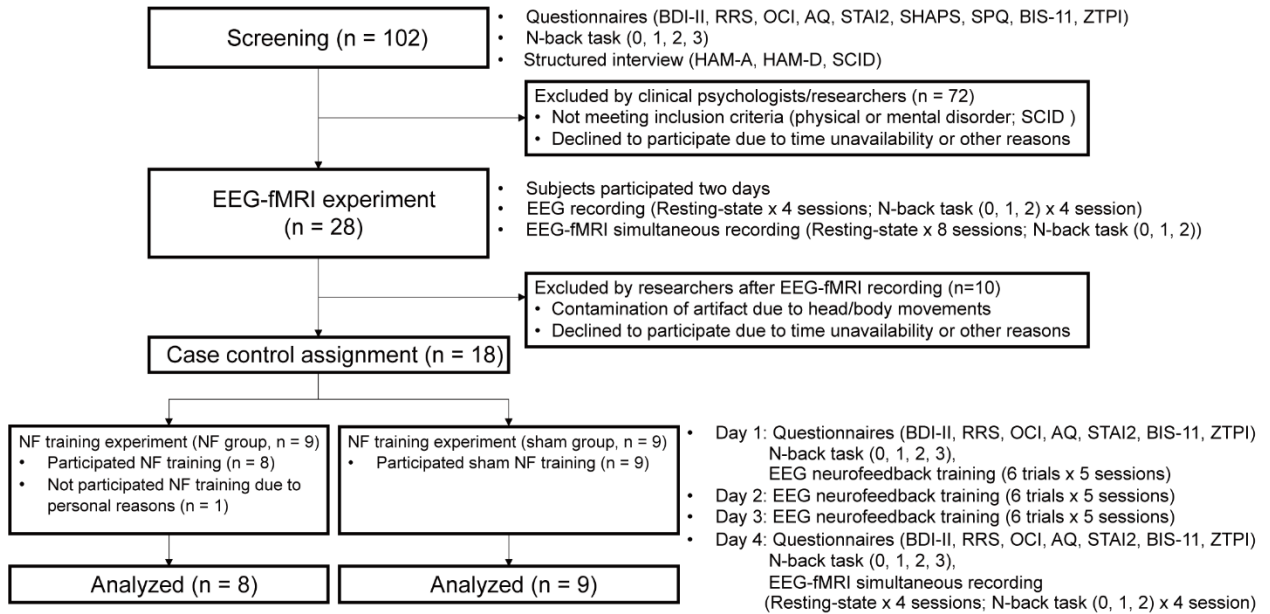

750

751 **Figure2. A flow of the experiment**

752 BDI-II: Beck Depression Inventory II; RRS: Rumination Response Scale; OCI:

753 Obsessive-Compulsive Inventory; AQ: Autism-Spectrum Quotient; STAI2: State-Trait

754 Anxiety Inventory, SHAPS: Snaith-Hamilton Pleasure Scale; SPQ: Schizotypal

755 Personality Questionnaire; BIS-11: Barratt Impulsiveness Scale 11; ZTPI: Zimbardo Time

756 Perspective Inventory; HAM-D: 21-item Hamilton Depression Rating Scale ; HAM-A:

757 Hamilton Anxiety Rating Scale; SCID: Structured Clinical Interview for DSM-IV-TR Axis

758 disorders (SCID); NF: Neurofeedback.

759

760 **Figure 3.**

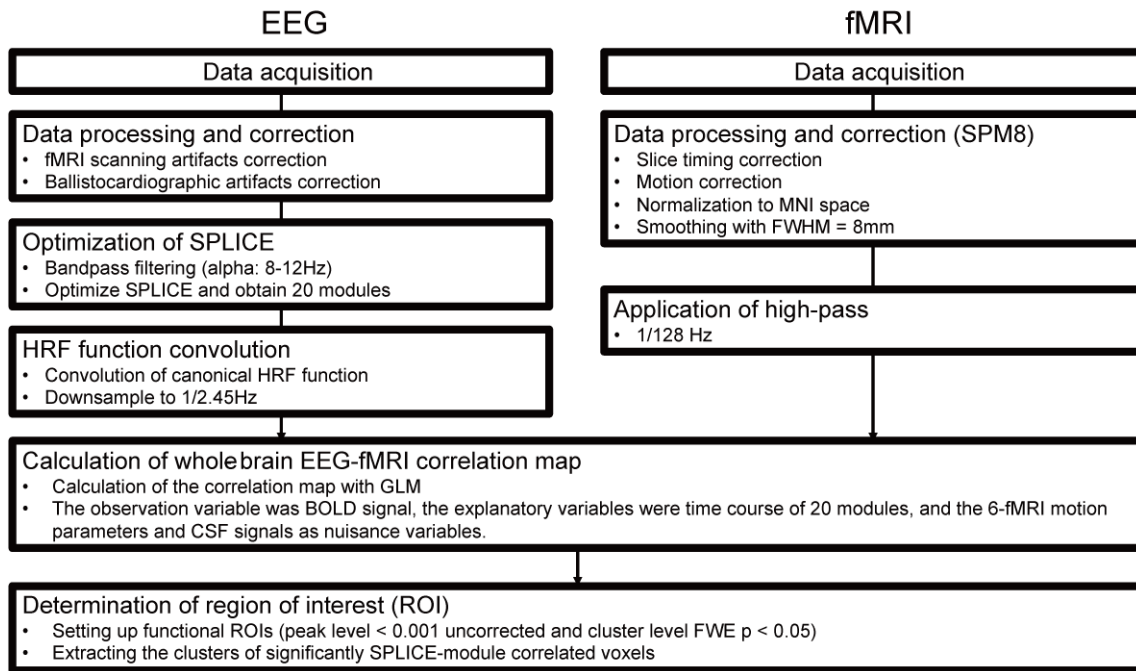

761

762 **Figure3. A flow of preprocess of EEG-fMRI data and its integration analysis in this**  
763 **study.**

764 SPLICE: stacked pooling and linear components estimation; HRF: hemodynamic  
765 response function; MNI, Montreal Neurological Institute; FWHM, full width at half  
766 maximum; GLM, General Linear Model; BOLD, blood-oxygen-level dependent; CSF,  
767 cerebrospinal fluid; FWE, family-wise error.

768

769 **Figure 4.**

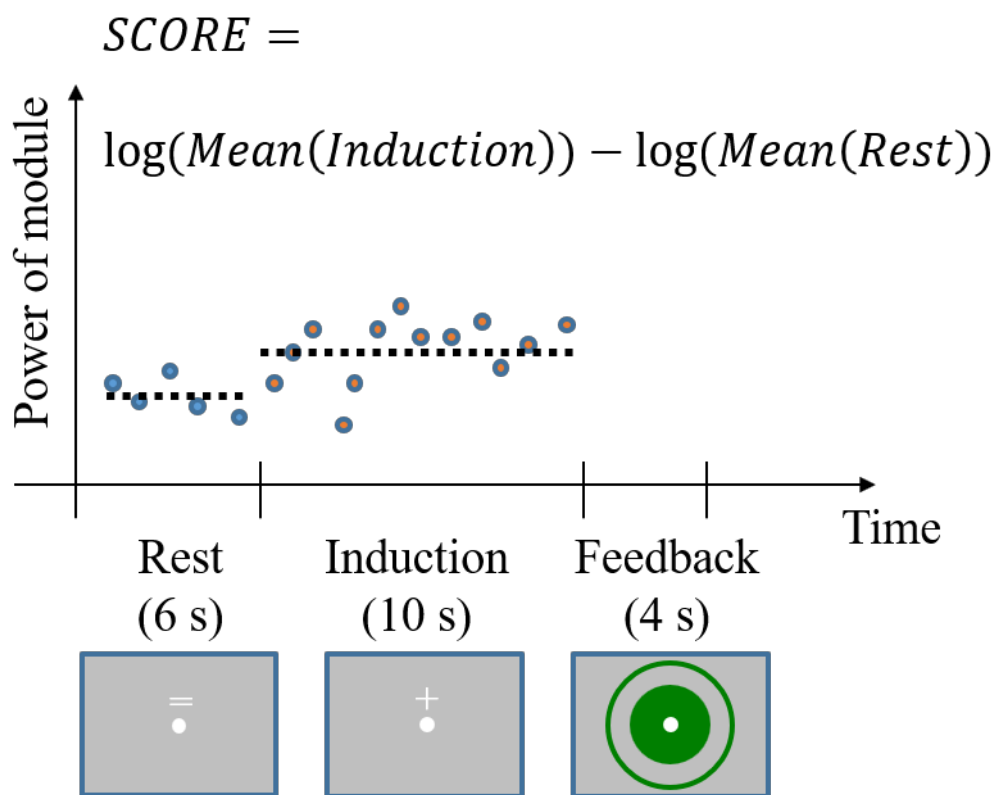

770

771 **Figure4. A protocol of EEG NF training in a single trial.**

772

773 **Figure 5.**

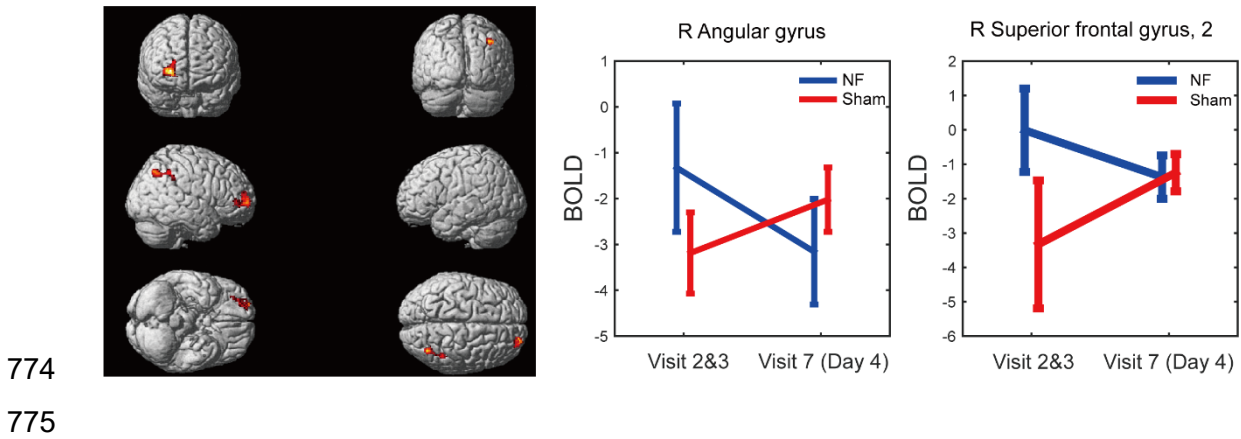

776 **Figure 5. Identification of clusters illustrated the interaction of groups and times.**

777 Clusters showed significant interaction of group (NF, sham) and time (pre: Visit 2&3, post:  
778 Visit 7 (Day4)). A contrast was 2-back > 0-back, and labelled by AAL toolbox;  
779 thresholding by p-value < 0.001, uncorrected and cluster level p < 0.05 corrected by  
780 Family-Wised Error (FWE, cluster size > 244 voxels).

781

782 **Figure 6.**

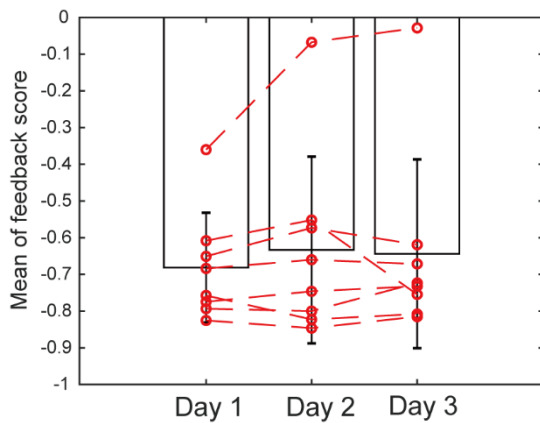

784 **Figure 6. Changes of feedback scores across three days NF training.**

785 Red dotted line showed mean of feedback scores for each participant.

786

787 **Tables**

788 **Table 1. Experimental Outline**

|                             | <b>Screening</b>                                      | <b>EEG-fMRI</b>            |                      | <b>NF training</b>                               |                      |                      |                                                  |
|-----------------------------|-------------------------------------------------------|----------------------------|----------------------|--------------------------------------------------|----------------------|----------------------|--------------------------------------------------|
|                             | Visit 1                                               | Visit 2                    | Visit 3              | Visit 4<br>(Day 1)                               | Visit 5<br>(Day 2)   | Visit 6<br>(Day 3)   | Visit 7<br>(Day 4)                               |
| <b>Questionnaires</b>       | BDI-II, RRS, OCI, AQ, STAI2, SHAPS, SPQ, BIS_11, ZTPI | -                          | -                    | <b>BDI-II, RRS, OCI, AQ, STAI2, BIS-11, ZTPI</b> | -                    | -                    | <b>BDI-II, RRS, OCI, AQ, STAI2, BIS-11, ZTPI</b> |
| <b>Structured interview</b> | HAM-A, HAM-D, SCID                                    | -                          | -                    | -                                                | -                    | -                    | -                                                |
| <b>N-back task</b>          | 0, 1, 2, 3                                            | -                          | -                    | 0, 1, 2, 3                                       | -                    | -                    | 0, 1, 2, 3                                       |
| <b>EEG data</b>             | -                                                     | -5-min resting state×4     | -5-min resting-state | -5-min resting-state                             | -5-min resting-state | -5-min resting-state | -                                                |
|                             |                                                       | -N-back task × 4 (0, 1, 2) | -NF training ×5      | -NF training ×5                                  | -NF training ×5      | -NF training ×5      |                                                  |

|                      |   |                                                                                             |   |   |   |                                                                                            |
|----------------------|---|---------------------------------------------------------------------------------------------|---|---|---|--------------------------------------------------------------------------------------------|
| <b>EEG-fMRI data</b> | - | -5-min<br>resting<br>state×8<br>-N-back<br>task×4<br>(0, 1, 2)<br>-T1-<br>weighted<br>image | - | - | - | 5-min<br>resting<br>state×4<br>-N-back<br>task×2<br>(0, 1, 2)<br>-T1-<br>weighted<br>image |
|----------------------|---|---------------------------------------------------------------------------------------------|---|---|---|--------------------------------------------------------------------------------------------|

789 NOTE: BDI-II: Beck Depression Inventory II; RRS: Rumination Response Scale; OCI:  
790 Obsessive-Compulsive Inventory; AQ: Autism-Spectrum Quotient; STAI2: State-Trait  
791 Anxiety Inventory, SHAPS: Snaith-Hamilton Pleasure Scale; SPQ: Schizotypal  
792 Personality Questionnaire; BIS-11: Barratt Impulsiveness Scale 11; ZTPI: Zimbardo Time  
793 Perspective Inventory; HAM-D: 21-item Hamilton Depression Rating Scale ; HAM-A:  
794 Hamilton Anxiety Rating Scale; SCID: Structured Clinical Interview for DSM-IV-TR Axis  
795 disorders (SCID); NF: neurofeedback.  
796

797 **Table 2. The demographics of participants in the NF training**

798 NOTE: NF: neurofeedback; BDI-II:Beck Depression Inventory II; RRS: Rumination

799 Response Scale

| <b>Variables</b>   |        | <b>NF group<br/>(n = 9)</b> | <b>Sham group<br/>(n = 9)</b> | <b>p-value<br/>of t-test</b> |
|--------------------|--------|-----------------------------|-------------------------------|------------------------------|
| <b>Age (years)</b> |        | 28.62 ± 10.84               | 25.97 ± 7.22                  | 0.606                        |
| <b>Gender</b>      | Female | 2                           | 2                             |                              |
|                    | Male   | 7                           | 7                             |                              |
| <b>BDI-II</b>      |        | 7.89 ± 3.26                 | 10.44 ± 6.50                  | 0.257                        |
| <b>RRS</b>         |        | 40.67 ± 9.18                | 35.44 ± 12.91                 | 0.317                        |

800

801 **Table 3. Comparison of statistical effect size associated with depressive**

802 **symptom scores between NF and sham group**

| <b>Variables</b>                 | <b>NF group (n = 8)</b> |                | <b>Sham group (n = 9)</b> |                | <b>Cohen's d</b> |
|----------------------------------|-------------------------|----------------|---------------------------|----------------|------------------|
|                                  | <b>Pre</b>              | <b>Post</b>    | <b>Pre</b>                | <b>Post</b>    |                  |
| <b>BDI-II (total)</b>            | 5.25<br>(5.52)          | 3.75<br>(4.43) | 7.22<br>(7.72)            | 5.33<br>(6.34) | 0.184            |
| <b>-Cognitive<br/>depression</b> | 2.25<br>(3.37)          | 1.75<br>(2.76) | 2.56<br>(3.47)            | 2.44<br>(3.05) | -0.390           |



|                            |                 |                 |                 |                 |        |
|----------------------------|-----------------|-----------------|-----------------|-----------------|--------|
| <b>-Somatic depression</b> | 3.00<br>(3.46)  | 2.00<br>(2.61)  | 4.67<br>(4.66)  | 2.89<br>(3.76)  | 0.479  |
| <b>RRS (total)</b>         | 31.00<br>(5.68) | 28.25<br>(4.40) | 31.33<br>(8.00) | 31.67<br>(8.70) | -0.722 |
| <b>-Brooding</b>           | 7.50<br>(5.68)  | 6.63<br>(1.92)  | 7.78<br>(2.11)  | 7.89<br>(2.93)  | -0.626 |
| <b>-Depression</b>         | 16.25<br>(2.96) | 15.88<br>(2.95) | 17.67<br>(5.48) | 17.56<br>(5.00) | -0.101 |
| <b>-Reflection</b>         | 7.25<br>(1.98)  | 5.75<br>(0.89)  | 5.89<br>(1.45)  | 6.22<br>(1.64)  | -1.050 |

803

804

805 **Table 4. Comparisons of Pre (Visit 2 & 3)/Post (Day 4) fMRI data during N-**  
 806 **back task.**

| Brain region                | Peak coordinate (MNI) |     |    | Cluster size |                 | Details                                                         |
|-----------------------------|-----------------------|-----|----|--------------|-----------------|-----------------------------------------------------------------|
|                             | X                     | Y   | Z  | Voxels       | Peak of T score |                                                                 |
| 0-back task                 |                       |     |    |              |                 |                                                                 |
| R Angular gyrus             | 38                    | -66 | 44 | 244          | 5.38            | R Angular<br>R Inferior parietal gyrus<br>R Supramarginal gyrus |
| R Superior frontal gyrus, 2 | 34                    | 44  | 2  | 330          | 4.17            | R Superior frontal gyrus, 2<br>R Middle frontal gyrus, 2        |

807

808

809 **Table 5. Comparison of N-back task performance during EEG-fMRI**  
 810 **simultaneous recording**

| Measure | Level  | NF group             |                   | Sham group           |                   | Cohen's d |
|---------|--------|----------------------|-------------------|----------------------|-------------------|-----------|
|         |        | Visit 2 & 3<br>(pre) | Visit 7<br>(post) | Visit 2 & 3<br>(pre) | Visit 7<br>(post) |           |
| D'      | 0-back | 4.12 ±<br>0.1        | 4.32 ± 0.1        | 4.32 ±<br>0.1        | 4.28 ± 0.1        | 0.48      |
|         | 1-back | 3.85 ±<br>0.6        | 4.11 ± 0.4        | 4.20 ±<br>0.4        | 4.28 ± 0.2        | 0.33      |
|         | 2-back | 3.18 ±<br>0.9        | 3.67 ± 0.7        | 3.52 ±<br>0.7        | 3.81 ± 0.6        | 0.30      |
| p (hit) | 0-back | 0.93 ±<br>0.2        | 0.99 ± 0.0        | 0.99 ±<br>0.0        | 0.99 ± 0.0        | 0.50      |
|         | 1-back | 0.90 ±<br>0.2        | 0.96 ± 0.1        | 0.98 ±<br>0.1        | 0.99 ± 0.0        | 0.36      |
|         | 2-back | 0.81 ±<br>0.2        | 0.91 ± 0.1        | 0.88 ±<br>0.1        | 0.94 ± 0.1        | 0.22      |

811

812

813
